# 1 Modulation of early level EEG signatures by distributed 2 facial emotion cues

3 **Diana Costa<sup>1,2</sup>, Camila Dias<sup>1,2</sup>, Teresa Sousa<sup>1,2</sup>, João Estiveira<sup>1,2</sup>, João Castelhana<sup>1,2</sup>,**  
4 **Verónica Figueiredo<sup>1,2</sup>, Andreia Pereira<sup>1,2</sup>, Miguel Castelo-Branco<sup>1,2,3\*</sup>**

5  
6 **<sup>1</sup> CIBIT - Coimbra Institute for Biomedical Imaging and Translational Research, University  
7 of Coimbra, Coimbra, Portugal**

8 **<sup>2</sup> ICNAS - Institute for Nuclear Sciences Applied to Health, University of Coimbra, Coimbra,  
9 Portugal**

10 **<sup>3</sup> FMUC - Faculty of Medicine, University of Coimbra, Coimbra, Portugal**

11

12 **\* Correspondence:**

13 **Miguel Castelo-Branco**

14 [mcbranco@fmed.uc.pt](mailto:mcbranco@fmed.uc.pt)

15

## 16 **Abstract**

17 Face perception plays an important role in our daily social interactions, as it is essential to  
18 recognize emotions. The N170 Event Related Potential (ERP) component has been widely  
19 identified as a major face-sensitive neuronal marker. However, despite extensive investigations  
20 conducted to examine this electroencephalographic pattern, there is yet no agreement regarding  
21 its sensitivity to the content of facial expressions.

22 Here, we aim to clarify the EEG signatures of the recognition of facial expressions by investigating  
23 ERP components that we hypothesize to be associated with this cognitive process. We asked the  
24 question whether the recognition of facial expressions is encoded by the N170 as well as at the  
25 level of P100 and P250. In order to test this hypothesis, we analysed differences in amplitudes  
26 and latencies for the three ERPs, in a sample of 20 participants. A visual paradigm requiring  
27 explicit recognition of happy, sad and neutral faces was used. The facial cues were explicitly  
28 controlled to vary only regarding mouth and eye components. We found that non neutral emotion  
29 expressions elicit a response difference in the amplitude of N170 and P250. In contrast with the  
30 P100, there by excluding a role for low level factors.

31 Our study brings new light to the controversy whether emotional face expressions modulate early  
32 visual response components, which have been often analysed apart. The results support the tenet  
33 that neutral and emotional faces evoke distinct N170 patterns, but go further by revealing that this  
34 is also true for P250, unlike the P100.

35 **Keywords:** facial expressions recognition; social attention; P100; N170; P250; EEG

## 36        **1. Introduction**

37        The dynamics of face perception involve several brain regions and circuits responsible for the  
38        early and high level visual processing of faces(1). Studies using functional magnetic resonance  
39        imaging (fMRI) can identify the brain regions underlying these processes but cannot capture their  
40        temporal properties. Thus, the dynamics of face perception neuronal mechanisms have been  
41        extensively studied based on electroencephalographic (EEG) signals (2).

42        Social attention has been used as a synonym for non-verbal social communication behaviors. Of  
43        socially relevant stimuli, faces and gazes are the two most important elements triggering this  
44        cognitive process (3) (4). Categorization facial expressions, implies allocation of selective  
45        attention which may also modulate the neural response differences between the categories of  
46        emotions. When the participants perform implicit tasks more directed to the aspect emotional  
47        expression, there seems to be a lower probability of finding differences between the categories  
48        of emotions, namely for the N170 component (5).

49        Facial expressions elicit robust neuronal responses that can be measured through event-related  
50        potentials (ERP) analysis. The lateral occipitotemporal face-sensitive N170 component is  
51        generally used as a major neuronal marker of face recognition. However, the literature is not  
52        unanimous about how N170 is affected by the emotional content of facial expressions(6,7). Some  
53        authors suggest N170 occurs as a result of early automatic structural encoding of faces, which  
54        occurs before a comparison of these structural descriptions with representations stored in  
55        memory (8,9). On the other hand, others challenge the view that structural encoding is temporally  
56        distinct from emotion processing and defend that the N170 can be modulated by emotional  
57        expressions, as shown by larger amplitude and longer latency (10–12).

58        Previous findings also suggest the involvement of P100 in face-specific visual processing (13,14).  
59        However, this posterior component often also assumed to have an extrastriate contribution is  
60        believed to reflect low-level visual features processing and, therefore, the P100 role in face  
61        recognition remains an open question (5). Another potentially relevant ERP is the P250. Like the  
62        commonly measured N170, the P250 is also maximal at occipito-temporal sites. There is evidence  
63        for P250 modulation during face perception (15,16) , but this ERP component has been often  
64        related to higher-level nonspecific aspects of face processing (17,18).

65        According to Puce et al. (19), these ERPs can be grouped in a robust positive- negative- positive  
66        (P100- N170- P250) ERP complex, serving as neuroelectric markers in the investigation of the  
67        visual processes involved in the recognition of facial expressions. There is also evidence that both  
68        P100 and N170 are also involved in generating differential responses to neutral vs. emotional  
69        expressions, similarly regions such as the amygdala (20).

70        Importantly, temporal information of face perception provided by EEG may be coupled with source  
71        localization techniques to identify their cortical origin. The inferior occipital gyrus (IOG), the lateral  
72        portion of the fusiform gyrus (FG), and the superior temporal sulcus (STS) have been described  
73        as the core system of face perception. IOG and FG are believed to mediate the encoding of faces,  
74        while STS is involved in the perception of social signals derived from faces, such as the direction  
75        of gaze and emotional expressions (21,22). However, the relationship between N170 and signal  
76        originating from these face-selective brain regions remains under discussion. Recent findings  
77        suggest the FG to be a main neuronal contributor to the N170 ERP component (2).

78 Here, we aim to contribute to this debate concerning the temporal dynamics and the  
79 electrophysiological nature of face perception. First, we seek to understand if we can objectively  
80 distinguish the emotional content of the facial expressions based on not only the N170 ERP  
81 component but also on direct comparisons with the P100 and P250. Then, we want to address  
82 whether the investigation of the neuronal sources underlying these temporal patterns can shed  
83 light on this debate.

84 To achieve this goal, we used an experimental paradigm in which the participants had to identify  
85 the facial expression presented on the screen to generate an action. The study was organized in  
86 two experiments, the only difference being the inclusion of a neutral face in the instruction phase,  
87 in experiment 2. Our results show that ERPs N170 and P250 are both modulated by facial  
88 expressions (happy and sad). Differences were only found between the conditions expressions  
89 – neutral faces but not between the expressions per se.

90

## 91 2. Materials and Methods

### 92 2.1 Experimental Design

93 Two experiments were performed, each on a different group of subjects. Below we describe  
94 together the attributes of the participants, as well as data acquisition, EEG processing and data  
95 analysis, since the information is similar between experiments. Separately we present the  
96 stimulation paradigms and the results of the two experiments.

97 The use of the paradigm described below required participants to recognize facial expressions  
98 which was informative for a subsequent action related to error monitoring neural processes (not  
99 reported in this paper). For this, two experiments were performed, the main task objective is the  
100 recognition and distinction between facial expressions (happy, sad and neutral) by the participant.  
101 The two experiments differ in the existence or not of a neutral face in the initial period (Experiment  
102 1) or in the instruction phase (Experiment 2) which allowed to control for the role of an explicit  
103 instruction for the neutral stimulus.

### 104 2.2 Participants

105 In total, 40 adult with normal or corrected-to-normal vision and no medical or psychological  
106 disorders were, included in this study: In the experiment one, 20 individuals were included (nine  
107 females), mostly right-handed (19), and aged between 20 and 36 years ( $26.8 \pm 4.514$ ); in the  
108 experiment two, 20 individuals were included (11 females), (all right-handed), and aged between  
109 20 to 33 years ( $25.7 \pm 4.193$ ), of these subjects, 5 participated in both experiments.

110 Written informed consent was obtained from all participants. The study was approved by the  
111 ethics committee of the Faculty of Medicine from the University of Coimbra and was conducted in  
112 accordance with the declaration of Helsinki.

113  
114  
115  
116  
117

## 118 2.3 Stimuli

### 119 2.3.1 Experiment 1

120 A standard set of colour photographs consisting of a male, each depicting happy, sad, and neutral  
121 faces, obtained from the Radboud Faces Database (23), were presented on a 17-inch monitor  
122 situated 60 cm away from the subject. The facial expression images had a mean luminance of  
123  $7.67 \times 10^1$  cd/m<sup>2</sup> (with screen luminance ranging from  $2.44 \times 10^1$  cd/m<sup>2</sup> to  $1.76 \times 10^2$  cd/m<sup>2</sup>).  
124 Neutral, happy, and sad faces (height  $4.55^\circ$  and width  $4.90^\circ$ ) were presented to the participants  
125 in a pseudo-randomized order (Figure 1A). A go/no-go task, based on facial expression  
126 recognition, was used to guarantee implicit expression processing (Figure 1B).

127

128

129 **Fig 1.** Overview of the facial stimuli paradigm used in experiment 1. Neutral, happy, and sad faces (A) were used as  
130 cues in a go/no-go paradigm (B) and promoted attentive expression processing. The sequence between face  
131 presentation and participants' response is also illustrated.

132

133 The stimulation paradigm included six conditions: rest, gap, emotional expression, fixation, target,  
134 and response. Initially, a neutral face was displayed for 1000 ms (rest period), followed by a gap  
135 period of 500 ms. Then, the instruction for the go/no-go task is presented during 750 ms. Here, a  
136 happy, or sad face was presented. The expression type cued the subsequent action, and thereby  
137 required attentive processing. A happy face with a gaze means go and perform a saccade in the  
138 same gaze direction; a sad face with a gaze means go and perform a saccade in the opposite  
139 gaze direction; a happy or sad face without a gaze means to no-go. After a fixation period (500 -  
140 1000 ms) and a target shown for 200 ms in the same direction as the gaze (height and width  
141  $0.72^\circ$ ), a black background appeared for 1500 ms, where the participants performed the task.

142

143

144

### 145 2.3.2 Experiment 2

146

147

148 A standard set of colour photographs consisting of a male, each depicting happy, sad, and neutral  
149 faces, obtained from Radboud Faces Database (23), were presented on a () monitor situated 60  
150 cm away from the subject. Neutral, happy, and sad faces (height  $9.02^\circ$  and width ) were  
151 presented to the participants in a pseudo-randomized order (Figure 1A). A go/no-go task, based  
152 on facial expression recognition, was used to guarantee implicit expression processing (Figure  
153 1B).

154

155

156 **Fig 2.** Overview of the facial stimuli paradigm used in experiment 2. Neutral, happy, and sad faces (A) were used as  
157 cues in a go/no-go paradigm (B) and allowed to study the implicit expression processing. The sequence between face  
158 presentation and participants' response is also illustrated.

159

160 As in experiment 1, this second paradigm also includes six conditions: rest (neutral faces), gap 1,  
161 social expression, gap 2, action instruction, and action. Initially, a neutral face was displayed for  
162 1000 ms (rest period), followed by a gap period of 200 or 500 ms. Then, the instruction (social  
163 expression) for the go/no-go task is presented during 350 ms. Here, a happy, sad or neutral face  
164 was presented. It is in this condition that the biggest difference between the two experiences, in

165 experiment one we only had happy and sad as social expression. A happy face with a gaze means  
166 go and perform a saccade or button press in the same gaze direction; a sad face with a gaze  
167 means go and perform a saccade or button press in the opposite gaze direction; a happy, sad or  
168 neutral face without a gaze means to no-go. After a gap 2 period (200 ms) and an action  
169 instruction been shown for 350 ms (target diamond (♦) – height and width 2.517°) or button press  
170 (target: square (□), – height and width 1.819) , a black background appeared for 1000 ms,  
171 where the participants performed the task.

172  
173

## 174 2.4 Experimental setup and data recording

175

176 EEG data were recorded using a 64 electrodes cap (Compumedics Quick cap; NeuroScan,  
177 USA). The scalp of the participants was first cleaned using abrasive gel and then the electrodes  
178 cap was placed on their head according to the international 10–20 standard system.

179 Electrooculogram (EOG) data were recorded via two pairs of additional electrodes, placed above  
180 and below the left eye and in the external corner of both eyes. The reference electrode was  
181 located between Cz and CPz The impedance of the electrodes was kept under 20 kΩ during the  
182 recordings. The electrodes were connected directly to the SynAmps 2 amplifier system  
183 (Compumedics NeuroScan, Texas, USA) and sampled at 1000Hz. Data were recorded using the  
184 Curry Neuroimage 7.08 (NeuroScan, USA). For each paradigm, the participants were informed  
185 about the respective task. The total duration of the experimental procedure including the  
186 preparation procedures took around 60 min.

187 The eyetracking (ET) data acquisition started with the calibration of the eye-tracker. The data  
188 were recorded at 120Hz in a tower-mounted high accuracy (0.25° – 0.5°) monocular eye-tracker  
189 (iView X™ Hi-Speed 1250Hz, SMI – SensoMotoric Instruments, Teltow, Germany).

190

## 191 2.5 EEG processing

192 In both experiments, we used MATLAB home-made script ( R2018b) and the EEGLAB toolbox  
193 functions (version 2) for EEG signal preprocessing and analysis.

194

195 The EEG data were downsampled to 500 Hz and filtered between 0.5 and 45 Hz. Noisy channels  
196 were removed and the electrodes were re-referenced to the average of all EEG (excluding EOG)  
197 channels. The data were segmented into epochs of 1700 ms length in experiment 1 and 1200 ms  
198 in experiment 2, with a 200 ms pre-instruction baseline. Epochs were visually inspected, and  
199 noisy trials were removed. Ocular, muscular and cardiac artifacts were removed from all EEG  
200 channels based on the independent components analysis (ICA) (24). The noisy channels  
201 previously removed were interpolated (spherical interpolation).

202

203 After pre-processing, in experiment 1 there were on average 150, 143 and 143 epochs per  
204 participant for happy, sad and neutral faces respectively ,in experiment 2 there were on average  
205 156, 158 and 155 epochs for happy, sad and neutral faces respectively.

206

207

208  
209  
210

## 2.5 Data Analysis

### 2.5.1 Event Related Potentials (ERPs) identification

211  
212

213 The N170 ERP component has been described as a negative peak around 170 ms after the  
214 stimulus beginning, particularly incident at the parieto-occipital electrodes (25,26), whereas, P100  
215 and P250 are ERP positive components. Their topology has also been described in the lateral  
216 parieto-occipital cortex as all these ERP components related to rapid processes of selective  
217 attention (27,28) . Therefore, we started by selecting the groups of electrodes where these ERPs  
218 were most prominent. This group of electrodes was T8, CP6, TP8, P8 (right hemisphere) and  
219 TP7, P7, P5, PO7 (left hemisphere) since they showed the most significant difference between  
220 the three expressions, in N170 component( $p < 0.01$  with Bonferroni correction). ERPs were first  
221 identified through the maximum (P100 and P250) and minimum (N170) peaks of each trial in the  
222 following P100 and N170 a time range of 50 to 200 ms and P250 a time range of 200 to 300 ms,  
223 in both experiments. Then, ERPs components for each experimental condition of interest (happy,  
224 sad, and neutral faces) were estimated per participant as the average of the identified peaks.  
225 Finally, N170, P100 and P250 were statistically compared for the three different expressions types  
226 in order to test for differences in amplitude, latency and lateralization.

227

228

### 2.5.2 Source Estimation

229  
230

231 Source analysis was conducted using the sLORETA software (29) (pascual-marqui). The  
232 procedure included exporting from MATLAB the preprocessed single-trial epochs, importing them  
233 into sLORETA software, averaging them (per subject and expression) and converting them to the  
234 source space. Each participant electrode location was co-registered with the realistic anatomical  
235 model using landmarks and standard electrode's position. The sLORETA uses a three-shell  
236 spherical head model registered to the digitized (30) atlas (Brain Imaging Centre, Montreal  
237 Neurological Institute). The solution space is restricted to cortical gray matter and the  
238 hippocampus. The sLoreta yields images of standardized current source density of a total of 6430  
239 voxels at 5 mm spatial resolution under these neuroanatomical constraints. Briefly, subject time  
240 and valence specific mean ERPs were transformed into the sLoreta domain and averaged across  
241 subjects within each experimental group. Localization of power was then determined for time  
242 windows 100 ms, 170 ms and 250 ms.

243

244

245

### 2.5.3 Statistical Analysis

247 IBM SPSS statistics 25 was used for statistical analysis. The maximum peak to peak amplitude  
248 differences between the face expressions (happy and sad) and neutral faces was tested by  
249 Pairwise methods:- Anova repeated measures with happy, sad and neutral faces as a factor,  
250 was used to examine the overall effects for different amplitudes, latencies, and peaks. This  
251 analysis was performed for both hemispheres (right and left). A P value of  $< 0.05$  was significant.

252 The same statistical analyses were performed for the three ERPs (P100 , N170, P250).

253

## 254 3.Results

255

### 256 3.1 ERPs amplitude and latency

257 In the analysis of the ERPs, the amplitude and latency of its main components, P100, N170 and  
258 P250 were estimated per participant and condition and compared. The analyses were performed  
259 per hemisphere to allow testing for lateralization effects. The results are, presented per  
260 experiment. For these analyses two clusters of channels were used, T8, TP8, P6, P8, (right  
261 hemisphere) and TP7, P7, P5, PO7, ( left hemisphere).

262

### 263 3.2 Experiment 1

#### 264 3.2.1 P100

265 When comparing EEG responses to happy, sad, and neutral faces at the level of P100 we found  
266 neither differences in amplitude nor latency. The grand average ERP waveforms are illustrated in  
267 Figure 3, whereas the statistical results are summarized in Figure 4.

268 In the right hemisphere the P100 average amplitude was  $1.959 \pm 0.308 \mu\text{V}$ ,  $1.952 \pm 0.340 \mu\text{V}$ , and  
269  $1.929 \pm 0.277 \mu\text{V}$  for happy, sad and neutral conditions respectively. Peaks of latencies were  
270 recorded, 123 ms after happy and sad stimuli and 122 ms after neutral stimuli. In the left  
271 hemisphere, were recorded amplitudes of  $3.809 \pm 0.601 \mu\text{V}$  for happy faces,  $3.994 \pm 0.656 \mu\text{V}$  for  
272 sad faces and  $3.311 \pm 0.563 \mu\text{V}$  for neutral faces. Latencies in this hemisphere were recorded at  
273 122 ms after happy and 123 ms after sad and neutral stimuli respectively.

274

275 **Fig 3.** Grand-average ERP waveforms from the left and right hemispheres for happy and sad expressions, and neutral  
276 faces. A) The 100 ms, 170 ms, and 250 ms are highlighted with a dashed line. The results presented are relative to the  
277 channel clusters TP7 P7, P5, PO7 at the left hemisphere, and T8, CP6, TP8, P8 at the right hemisphere. B) Scalp  
278 topographic voltage maps for the emotions (happy and sad) stimulus condition. Maps reflect the activity profile at the  
279 following post-stimulus onset latencies: P100 (100 ms) N170 (170 ms), and P250 (250 ms).

280

281

282

283 **Fig 4.** Summary of amplitude and latency analyses for the ERP components P100, N170, and P250 when comparing  
284 brain responses during emotional and neutral faces recognition (Experiment 1). A) We found significant differences in  
285 all ERPs between neutral faces and expressions (happy and sad), except for P100 in both hemispheres. B) We only  
286 found significant latency differences for the P250, in the right hemisphere, between neutral faces and happy faces.  
287 Error bars depict the standard error of the mean.

288

289

290

291

292

#### 3.2.2 N170

293 When comparing the three conditions, at the level of N170 we found differences in the amplitude  
294 between neutral-sad in the right hemisphere and between neutral-happy in both hemispheres.  
295 The grand average ERP waveforms are illustrated in Figure 3, whereas the statistical results are  
296 summarized in Figure 4.

297 In the right hemisphere the N170 average amplitude was  $-2.976 \pm 0.330 \mu\text{V}$ ,  $-2.769 \pm 0.339 \mu\text{V}$ , and  
298  $-1.727 \pm 0.332 \mu\text{V}$  for happy, sad and neutral conditions respectively, significant differences were  
299 found between neutral - sad,  $1.032 \pm 0.358 \mu\text{V}$ ,  $p = 0.03$  and neutral – happy,  $1.239 \pm 0.4 \mu\text{V}$ ,  $p =$   
300  $0.02$ ,  $F(2,18)=4.560$ ,  $p= 0.025$ . Latencies were recorded at 172 ms after happy stimuli, 171 ms  
301 after sad and 174 ms after neutral stimuli. In the left hemisphere the average amplitude was -  
302  $3.461 \pm 0.420 \mu\text{V}$ ,  $-3.213 \pm 0.373 \mu\text{V}$  and  $-2.573 \pm 0.436 \mu\text{V}$  for happy, sad and neutral conditions,  
303 significant differences were found between neutral – happy,  $0.888 \pm 0.290 \mu\text{V}$ ,  $p = 0.02$ ,  
304  $F(2,18)=4.640$ ,  $p=0.024$ . Latencies were recorded at 175 ms after happy stimuli, and 176 ms  
305 after sad and neutral stimuli.

306

307

### 308 3.2.3 P250

309

310 When comparing the three conditions at the level of P250 we found differences in the amplitude  
311 between neutral-sad and neutral-happy in both hemispheres and in the latency neutral and happy  
312 in right hemisphere. The grand average ERP waveforms are illustrated in Figure 3, whereas the  
313 statistical results are summarized in Figure 4.

314 In the right hemisphere, the P250 average amplitude was  $1.290 \pm 0.379 \mu\text{V}$ ,  $1.237 \pm 0.387 \mu\text{V}$ , and  
315  $2.260 \pm 0.577 \mu\text{V}$  for happy, sad and neutral faces. We found significant differences between  
316 neutral – sad,  $1.024 \pm 0.324 \mu\text{V}$ ,  $p = 0.015$  and neutral – happy,  $0.970 \pm 0.318 \mu\text{V}$ ,  $p = 0.02$ ,  
317  $F(2,18)=4.879$ ,  $p=0.02$ . Latencies were recorded at 240 ms after happy stimuli, 246 ms after sad  
318 and 253 ms after neutral stimuli, significant differences were found between neutral – happy,  
319  $13.8 \pm 4.502 \text{ ms}$ ,  $p=0.019$ ,  $F(2,18)= 6.185$ ,  $p=0.009$ . In left hemisphere, significant differences were  
320 recorded at amplitudes of  $1.812 \pm 0.428 \mu\text{V}$  for happy,  $1.804 \pm 0.376 \mu\text{V}$  for sad and  $2.949 \pm 0.505$   
321  $\mu\text{V}$  for neutral faces, found between neutral – sad,  $1.145 \pm 0.349 \mu\text{V}$ ,  $p = 0.012$  and neutral – happy,  
322  $1.136 \pm 0.321 \mu\text{V}$ ,  $p = 0.007$ ,  $F(2,18)=6.094$ ,  $p=0.01$ . Latencies were recorded at 236 ms after  
323 happy stimuli, 235 ms after sad stimuli and 243 ms after neutral stimuli.

324

## 325 3.3 Experiment 2

### 326 3.3.1 P100

327 When comparing EEG responses to happy, sad, and neutral faces at the level of P100 we found  
328 neither differences in amplitude nor latency. The grand average ERP waveforms are illustrated in  
329 Figure 5, whereas the statistical results are summarized in Figure 6.

330 In the right hemisphere the P100 average amplitude was  $3.229 \pm 0.651 \mu\text{V}$ ,  $3.367 \pm 0.602 \mu\text{V}$  and  
331  $3.359 \pm 0.581 \mu\text{V}$  for happy, sad and neutral conditions respectively. Latencies were recorded at  
332 129 ms after happy stimuli, 130 ms after sad and 132 ms after neutral stimuli. In the left  
333 hemisphere, P100 average amplitude was  $4.488 \pm 0.877 \mu\text{V}$ ,  $4.611 \pm 0.946 \mu\text{V}$  and  $5.007 \pm 0.958 \mu\text{V}$   
334 for happy, sad and neutral faces. Latencies were recorded at 131 ms after happy stimuli and 133  
335 ms after sad and neutral stimuli.



336

337 **Fig 5.** Grand-average ERP waveforms from the left and right hemispheres for happy and sad expressions, and neutral  
338 faces. The 100 ms, 170 ms, and 250 ms are highlighted with a dashed line. The results presented are relative to the  
339 channel clusters TP7 P7, P5, PO7 at the left hemisphere, and T8, CP6, TP8, P8 at the right hemisphere. B) Scalp  
340 topographic voltage maps for the emotions (happy and sad) stimulus condition. Maps reflect the activity profile at the  
341 following post-stimulus onset latencies: P100 (100 ms) N170 (170 ms), and P250 (250 ms).

342

343 **Fig 6.** Summary of amplitude and latency analyses for the ERP components P100, N170, and P250 when comparing  
344 brain responses during emotional and neutral faces recognition (Experiment 2). A) We found significant differences in  
345 all ERPs between neutral faces and expressions (happy and sad), except for the P100 in both hemispheres. B) We did  
346 not find significant latency differences for ERPs in neither of the hemispheres. Error bars depict the standard error of  
347 the mean.

348

### 349 3.3.2. N170

350

351 When comparing EEG responses to happy, sad, and neutral faces at the level of N170 we found  
352 differences in the amplitude between neutral and sad faces in both hemispheres. The grand  
353 average ERP waveforms are illustrated in Figure 5, whereas the statistical results are summarized  
354 in Figure 6.

355 In the right hemisphere the N170 amplitude average was  $-3.067 \pm 0.457 \mu\text{V}$ ,  $-2.881 \pm 0.410 \mu\text{V}$ , and  
356  $-2.153 \pm 0.309 \mu\text{V}$  for happy, sad and neutral conditions respectively, significant differences were  
357 found between neutral – happy,  $0.728 \pm 0.246 \mu\text{V}$   $p=0.047$ ,  $F(2,18)=8.152$ ,  $p=0.003$ .  
358 Latencies were recorded at 183 ms after happy and sad stimuli and 180 ms after neutral stimuli.  
359 In the left hemisphere, amplitude average for N170 was  $-2.906 \pm 0.482 \mu\text{V}$ ,  $-2.500 \pm 0.619 \mu\text{V}$  and  
360  $-1.737 \pm 0.615 \mu\text{V}$  for happy, sad and neutral conditions, significant differences were found  
361 between neutral - happy,  $0.763 \pm 0.147 \mu\text{V}$ ,  $p = 0.002$ ,  $F(2,18)=11.774$ ,  $p=0.001$ . Latencies were  
362 recorded at 179 ms after happy stimuli and 176 ms after sad and neutral stimuli.

363

364

365

### 366 3.3.3 P250

367

368 When comparing EEG responses to happy, sad, and neutral faces at the level of P250 we found  
369 differences in the amplitude between neutral and happy, and neutral and sad in both  
370 hemispheres. The grand average ERP waveforms are illustrated in Figure 5, whereas the  
371 statistical results are summarized in Figure 6.

372 In the right hemisphere the P250 amplitude average was  $1.127 \pm 0.397 \mu\text{V}$ ,  $0.923 \pm 0.599 \mu\text{V}$  and  
373  $2.098 \pm 0.452 \mu\text{V}$  for happy, sad and neutral conditions respectively, significant differences  
374 between neutral – sad,  $1.175 \pm 0.343 \mu\text{V}$ ,  $p = 0.023$  and neutral – happy  $\mu\text{V}$ ,  $p = 0.028$ ,  
375  $F(2,18)=11.850$ ,  $p=0.001$ . Latencies were recorded at 256 ms, 252 and 259 ms after happy, sad  
376 and neutral stimuli respectively. In the left hemisphere, amplitude average for P250 was  
377  $0.989 \pm 0.558 \mu\text{V}$ ,  $1.416 \pm 0.583 \mu\text{V}$  and  $2.686 \pm 0.691 \mu\text{V}$  for happy, sad and neutral respectively,  
378 significant differences were found between neutral – sad,  $1.271 \pm 0.270 \mu\text{V}$ ,  $p = 0.003$  and neutral  
379 – happy,  $1.697 \pm 0.472 \mu\text{V}$ ,  $p = 0.017$ ,  $F(2,18)=18.008$ ,  $p=0.0002$ . Latencies were recorded at 240  
380 ms, 243 ms and 246 ms after happy, sad and neutral stimuli.

381

382

#### 383 4. Source Estimation for the ERPs components modulated by social attention

384

385 The results of the sLoreta for ERPs modulated by emotional expressions (happy and sad) for 170  
386 ms and 250 ms post-stimulus presentation onset are depicted in fig.7.

387 Sources estimation for expression at 170 ms (N170) was found in the precuneus, BA 7 (MNI  
388 coordinates: x= -5, y= -80, z= 50) and at 250 ms (P250) was found in the postcentral gyrus, BA 5  
389 (MNI coordinates: x= -5, y=-50, z= 70), significant at P = 0.0002, two-tailed t test.

390

391

392 **Fig 7.** sLORETA representation of significant correlations of emotional expressions for N170 and P250. A) N170  
393 source located in the parietal lobe and precuneus B) P250 source located in the parietal lobe, postcentral gyrus.

394

#### 395 5. Discussion

396 In this study, we investigated the temporal dynamics of the neural mechanisms underlying face  
397 recognition, following the hypothesis that not only the N170 but also other related components as  
398 P100 and P250 are modulated by the emotional content of facial stimuli. To this end, we used an  
399 implicit face recognition task, while controlling for selective attention. We tested for amplitude and  
400 latency differences between neutral and emotional expressions, particularly happy and sad faces.  
401 Moreover, we aimed at exploring the neural sources of social attention.

402 N170 is a well-established ERP component of face processing (4) . However, there is no  
403 consensus regarding N170 selectivity for the content of facial expressions. Some studies support  
404 that the presence of N170 amplitude dependence on emotional facial expressions (31,32),  
405 whereas others suggest that this ERP is modulated by more low level features of facial stimuli but  
406 does not discriminate between expressions (9,33). Our results contribute to this debate by  
407 showing the presence of an effect when attention is controlled for.

408 Our results show indeed that there is a clear difference in electrophysiological responses  
409 between expressions (happy and sad) and neutral faces. In both experiments, a similar pattern  
410 was observed, we did see a desponse difference between facial expressions from neutral faces  
411 (except for the P100), with no significant differences between sad and happy faces, in both  
412 experiments. These results are consistent with previous studies in which the N170 was affected  
413 by emotion expression, specifically happy and fearful faces had larger amplitude than neutral  
414 faces (34), but did not discriminate between different emotions (35). N170 has been proposed  
415 to represent an early configural stages of face processing, which may reflect an activation related  
416 to the structural coding of faces, and from this point of view response levels might be expected to  
417 be relatively invariant to emotional details, in facial expressions. However, Luo, et al., 2010 (33)  
418 proposed that ERPs between the 150 to 300 ms time period constitute a "second stage" of  
419 expression processing that is already sensitive to emotionality in general (compared to a neutral  
420 expression); arguing that the differentiation between specific expressions / emotions occurs only  
421 in a "third stage" that starts after 300ms.

422 The earliest stage of visual processing, P100 is associated with processing sensory  
423 characteristics of a visual stimulus, there by unlikely to be modifiable by familiarity and

424 expressions (36). However, there are studies that suggest that differentiation between  
425 expressions can occur, such as fear and anger or happiness and anger (37,38).

426 According to our results, no significant difference was identified between the P100 amplitudes in  
427 the three facial expressions (happy, sad and neutral), as such we argue that this ERP component  
428 is not modulated by expressions. P100 can also be modulated by attention, so the increase in  
429 amplitude in prior studies may be due not only to expressions but also to increased effects of  
430 attention (13). Under controlled attention, (further optimized in experiment 2), we found no  
431 significant effect of the presence of emotion cues, concerning the P100. For comparison, there is  
432 corroborating evidence that as early as the P100 component, negative and positive expressions,  
433 such as fear, sadness or happiness, cannot be differentiated (32,37). We did not observe P100  
434 amplitude significant difference emotions types (happy and sad), or between both emotional faces  
435 types and the neutral faces. These results are in agreement with other authors, such as (25,39).

436 P250 is the last ERP that forms the P100-N170-P250 complex, according to previous studies like  
437 (40) this ERP is responsive to emotional expressions, amplitudes are augmented for emotional  
438 expressions compared to neutral.

439 Our results show, in both experiments, an amplitude increase (more negative) in happy and sad  
440 facial expressions for the P250. Unlike the previous ERPs (P100, N170), the neutral faces were  
441 the ones with the highest amplitudes, with significant differences with the happy and sad  
442 amplitude.

443 In this work, latency was only significant in the right hemisphere of the first experiment, in ERP  
444 P250 between neutral and happy faces. These results do agree with previous studies (41), who  
445 found latency change for expressions when compared to neutral stimuli, justifying that this  
446 difference reflected the impact voluntary attention, which is also consistent with the conditions of  
447 experiment 1.

448 Both in experiment 1 and 2, differences were only found between the conditions expressions –  
449 neutral faces and not between the emotional expression types happy – sad, showing that the  
450 differences between both experiments did not change the general patterns of results.

451 Our source analysis allowed to investigate the spatical location of the signals studied, as such,  
452 to analyse the sources of facial expressions and to compare results from previous studies . It  
453 was expected that the location of the active sources should be found in the parieto-occipital  
454 region, because this region contributes mainly to the processing of facial expressions (42).  
455 N170 and P250 were modulated by the expressions happy and sad, so we went to analyse  
456 where the sources of each one are located, and confirmed that they match The source of N170  
457 was identified in the precuneus. This region is involved in visuospatial processing, directing  
458 attention in space and is one of the core regions of the perspective taking network, both from a  
459 cognitive and affective point of view (43,44). The source of the P250 was located in the  
460 postcentral gyrus that belongs to the superior parietal lobe (SPL) which are major areas in the  
461 attention central system(45). The precuneus is also selectively connected to the SPL.  
462 Converging evidence then suggests that the SPL and the precuneus cooperate in directing  
463 attention in space not only during the execution of goal-directed movements, but also in the  
464 absence of overt motor responses(46). In a Simon et al., 2002 (47) study participants performed  
465 various tasks, including attention, pointing, grabbing, saccades and calculating. Both precuneus  
466 and SPL were activated by saccadic and pointing task while the precuneus showed more  
467 activation only for attention. Le et al., 1998 (48) reported that the shift of attention to visual

468 stimuli, when compared to sustained attention, produced bilateral activation of precuneus and  
469 SPL.

470 Although, accurate recognition of complex emotions in facial expressions is usually more evident  
471 in the right hemisphere (42), in our experiments, sources were located in both or left hemispheres.

472 Both experiments were carried out with the purpose of contributing to the clarification of the open  
473 questions whether relatively early ERPs components can be modulated by facial expressions. We  
474 can conclude that N170 is modulated by expressions and it is possible to differentiate between  
475 expressions and neutral faces, but not between positive and negative expressions (happy and  
476 sad), which also holds true for the P250. Regarding the P100 we can conclude that it is not  
477 modulated by emotional expressions, in line with the notion that it is a quite early ERP type  
478 involved in low level processing. Our paradigm does therefore shed converging light on the neural  
479 correlates of the perception of emotional faces(4).

480

#### 481 References

- 482 1. Haxby J V., Hoffman EA, Gobbini MI. Human neural systems for face recognition and  
483 social communication. *Biol Psychiatry*. 2002 ;51(1):59–67.
- 484 2. Gao Z, Wang X, Yang Y, Mu C, Cai Q, Dang W, et al. EEG-Based Spatio-Temporal  
485 Convolutional Neural Network for Driver Fatigue Evaluation. *IEEE Trans neural networks  
486 Learn Syst*. 2019 ;30(9):2755–63.
- 487 3. Freeman. Conceptualizing social attention in development research. *Physiology &  
488 Behavior*, 176(1), 139–148. <https://doi.org/10.1117/12.2549369>.
- 489 4. Kuang S. Two Polarities of Attention in Social Contexts: From Attending-to-Others to  
490 Attending-to-Self. *Front Psychol*. 2016;7(February):1–4.
- 491 5. daSilva EB, Crager K, Puce A. On dissociating the neural time course of the processing  
492 of positive emotions. *Neuropsychologia*. 2016; 83:123–37. Available from:  
493 <http://dx.doi.org/10.1016/j.neuropsychologia.2015.12.001>
- 494 6. Eimer M, Holmes A. Event-related brain potential correlates of emotional face processing.  
495 *Neuropsychologia*. 2007; 45(1):15–31. Available from:  
496 <http://dx.doi.org/10.1016/j.neuropsychologia.2006.04.022>
- 497 7. Rossion B. Understanding face perception by means of human electrophysiology. *Trends  
498 Cogn Sci* . 2014; 18(6):310–8. Available from: <http://dx.doi.org/10.1016/j.tics.2014.02.013>
- 499 8. Ashley V, Vuilleumier P, Swick D. Time course and specificity of event related potentials  
500 to emotional expressions. *NeuroReport*. 2004; 15(1):211–6.
- 501 9. Eimer M, Holmes A. The role of spatial attention in the processing of facial expression:  
502 An ERP study of rapid brain responses to six basic emotions. *Cognitive, Affective &  
503 Behavioral Neuroscience*. 2003; 3(2):97–110.
- 504 10. Blau VC, Maurer U, Tottenham N, McCandliss BD. The face-specific N170 component is  
505 modulated by emotional facial expression. *Behav Brain Funct*. 2007; 3:1–13.
- 506 11. Hinojosa JA, Mercado F, Carretié L. N170 sensitivity to facial expression: A meta-  
507 analysis. *Neurosci Biobehav Rev*. 2015;55:498–509. Available from:

- 508 <http://dx.doi.org/10.1016/j.neubiorev.2015.06.002>
- 509 12. Maratos FA, Garner M, Hogan AM, Karl A. When is a face a face? Schematic faces,  
510 emotion, attention and the N170. *AIMS Neurosci.* 2015; 2(3):172–82.
- 511 13. Dering B, Donaldson DI. Dissociating attention effects from categorical perception with  
512 ERP functional microstates. *PLoS One.* 2016; 11(9):1–18.
- 513 14. Monteiro R, Simões M, Andrade J, Castelo Branco M. Processing of Facial Expressions  
514 in Autism: a Systematic Review of EEG/ERP Evidence. *Rev J Autism Dev Disord.* 2017;  
515 4(4):255–76.
- 516 15. Debruille JB, Brodeur MB, Hess U. Assessing the Way People Look to Judge Their  
517 Intentions. *Emotion.* 2011; 11(3):533–43.
- 518 16. Yang C, Zhang T, Li Z, Heeramun-Aubeeluck A, Liu N, Huang N, et al. Changes in event-  
519 related potentials in patients with first-episode schizophrenia and their siblings. *BMC*  
520 *Psychiatry.* 2017; 17(1):1–8. Available from: <http://dx.doi.org/10.1186/s12888-016-1189-7>
- 521 17. Jemel B, Schuller AM, Goffaux V. Characterizing the spatio-temporal dynamics of the  
522 neural events occurring prior to and up to overt recognition of famous faces. *J Cogn*  
523 *Neurosci.* 2010; 22(10):2289–305.
- 524 18. Schweinberger SR, Pickering EC, Burton AM, Kaufmann JM. Human brain potential  
525 correlates of repetition priming in face and name recognition. *Neuropsychologia.* 2002;  
526 40(12):2057–73.
- 527 19. Puce A, McNeely ME, Berrebi ME, Thompson JC, Hardee J, Brefczynski-Lewis J.  
528 Multiple faces elicit augmented neural activity. *Front Hum Neurosci.* 2013; 7(MAY):1–12.
- 529 20. Yang YF, Brunet-Gouet E, Burca M, Kalunga EK, Amorim MA. Brain Processes While  
530 Struggling With Evidence Accumulation During Facial Emotion Recognition: An ERP  
531 Study. *Front Hum Neurosci.* 2020; 14(September):1–15.
- 532 21. Bernstein M, Yovel G. Two neural pathways of face processing: A critical evaluation of  
533 current models. *Neurosci Biobehav Rev.* 2015; 55:536–46. Available from:  
534 <http://dx.doi.org/10.1016/j.neubiorev.2015.06.010>
- 535 22. Freiwald W, Duchaine B, Yovel G. Face Processing Systems: From Neurons to Real-  
536 World Social Perception. *Annu Rev Neurosci.* 2016; 39:325–46.
- 537 23. Langner O, Dotsch R, Bijlstra G, Wigboldus DHJ, Hawk ST, van Knippenberg A.  
538 Presentation and validation of the radboud faces database. *Cogn Emot.* 2010;  
539 24(8):1377–88.
- 540 24. Castelhana J, Duarte IC, Wibrál M, Rodriguez E, Castelo-Branco M. The dual facet of  
541 gamma oscillations: Separate visual and decision making circuits as revealed by  
542 simultaneous EEG/fMRI. *Hum Brain Mapp.* 2014 Oct 1;35(10):5219–35. Available from:  
543 <http://doi.wiley.com/10.1002/hbm.22545>
- 544 25. Calvo MG, Beltrán D. Brain lateralization of holistic versus analytic processing of  
545 emotional facial expressions. *Neuroimage.* 2014; 92:237–47. Available from:  
546 <http://dx.doi.org/10.1016/j.neuroimage.2014.01.048>
- 547 26. Nakamura K. Functional delineation of the human occipito-temporal areas related to face  
548 and scene processing: A PET study. *Brain.* 2000; 123(9):1903–12.

- 549 27. Amodio DM, Bartholow BD, Ito TA. Tracking the dynamics of the social brain: ERP  
550 approaches for social cognitive and affective neuroscience. *Soc Cogn Affect Neurosci*.  
551 2014; 9(3):385–93.
- 552 28. Ibanez A, Melloni M, Huepe D, Helgiu E, Rivera-Rei A, Canales-Johnson A, et al. What  
553 event-related potentials (ERPs) bring to social neuroscience. *Soc Neurosci*. 2012;  
554 7(6):632–49.
- 555 29. Standardized low resolution brain electromagnetic tomography (. 2002;5–12.
- 556 30. Laitinen L. Co-planar stereotaxic atlas of the human brain: 3-dimensional proportional  
557 system: an approach to cerebral imaging. *Clin Neurol Neurosurg*. 1989; 91(3):277–8.  
558 Available from:  
559 <https://www.sciencedirect.com/science/article/pii/0303846789901285?via%3Dihub>
- 560 31. Rellecke J, Sommer W, Schacht A. Does processing of emotional facial expressions  
561 depend on intention? Time-resolved evidence from event-related brain potentials. *Biol*  
562 *Psychol*. 2012; 90(1):23–32. Available from:  
563 <http://dx.doi.org/10.1016/j.biopsycho.2012.02.002>
- 564 32. Utama NP, Takemoto A, Koike Y, Nakamura K. Phased processing of facial emotion: An  
565 ERP study. *Neurosci Res*. 2009; 64(1):30–40.
- 566 33. Smith E, Weinberg A, Moran T, Hajcak G. Electrocortical responses to NIMSTIM facial  
567 expressions of emotion. *Int J Psychophysiol*. 2013; 88(1):17–25. Available from:  
568 <http://dx.doi.org/10.1016/j.ijpsycho.2012.12.004>
- 569 34. Luo W, Feng W, He W, Wang NY, Luo YJ. Three stages of facial expression processing:  
570 ERP study with rapid serial visual presentation. *Neuroimage*. 2010; 49(2):1857–67.  
571 Available from: <http://dx.doi.org/10.1016/j.neuroimage.2009.09.018>
- 572 35. Boucsein W, Schaefer F, Sokolov EN, Schröder C, Furedy JJ. The Color-Vision  
573 Approach to Emotional Space: Cortical Evoked Potential Data. *Integr Physiol Behav Sci*.  
574 2001;36(2):137–53.
- 575 36. Caharel S, Bernard C, Thibaut F, Haouzir S, Di Maggio-Clozel C, Allio G, et al. The  
576 effects of familiarity and emotional expression on face processing examined by ERPs in  
577 patients with schizophrenia. *Schizophr Res*. 2007; 95(1–3):186–96.
- 578 37. Chiao JY, Adams RB, Tse PU, Lowenthal WT, Richeson JA, Ambady N. Knowing who's  
579 boss: fMRI and ERP investigations of social dominance perception. *Gr Process Intergr*  
580 *Relations*. 2008; 11(2):201–14.
- 581 38. Klucharev V, Sams M. Interaction of gaze direction and facial expressions processing:  
582 ERP study. *Neuroreport*. 2004; 15(4):621–5.
- 583 39. Morel S, Ponz A, Mercier M, Vuilleumier P, George N. EEG-MEG evidence for early  
584 differential repetition effects for fearful, happy and neutral faces. *Brain Res [Internet]*.  
585 2009;1254:84–98. Available from: <http://dx.doi.org/10.1016/j.brainres.2008.11.079>
- 586 40. Chang Y, Xu J, Shi N, Zhang B, Zhao L. Dysfunction of processing task-irrelevant  
587 emotional faces in major depressive disorder patients revealed by expression-related  
588 visual MMN. *Neurosci Lett [Internet]*. 2010;472(1):33–7. Available from:  
589 <http://dx.doi.org/10.1016/j.neulet.2010.01.050>
- 590 41. Wronka E, Walentowska W. Attention modulates emotional expression processing.

- 591 Psychophysiology. 2011;48(8):1047–56.
- 592 42. Simões M, Monteiro R, Andrade J, Mouga S, França F, Oliveira G, et al. A novel  
593 biomarker of compensatory recruitment of face emotional imagery networks in autism  
594 spectrum disorder. *Front Neurosci.* 2018; 12(NOV):1–15.
- 595 43. Kawashima R, Roland PE, O’sullivan BT. Functional anatomy of reaching and visuomotor  
596 learning: A positron emission tomography study. *Cereb Cortex.* 1995; 5(2):111–22.
- 597 44. Wenderoth N, Debaere F, Sunaert S, Swinnen SP. The role of anterior cingulate cortex  
598 and precuneus in the coordination of motor behaviour. *Eur J Neurosci.* 2005; 22(1):235–  
599 46.
- 600 45. Kamali A, Sair HI, Radmanesh A, Hasan KM. Decoding the superior parietal lobule  
601 connections of the superior longitudinal fasciculus/arcuate fasciculus in the human brain.  
602 *Neuroscience.* 2014; 277:577–83. Available from:  
603 <http://dx.doi.org/10.1016/j.neuroscience.2014.07.035>
- 604 46. Cavanna AE, Trimble MR. The precuneus: A review of its functional anatomy and  
605 behavioural correlates. *Brain.* 2006; 129(3):564–83.
- 606 47. Simon O, Mangin JF, Cohen L, Le Bihan D, Dehaene S. Topographical layout of hand,  
607 eye, calculation, and language-related areas in the human parietal lobe. *Neuron.* 2002;  
608 33(3):475–87.
- 609 48. Le TH, Pardo J V., Hu X. 4 T-fMRI study of nonspatial shifting of selective attention:  
610 Cerebellar and parietal contributions. *J Neurophysiol.* 1998; 79(3):1535–48.
- 611

A

NEUTRAL

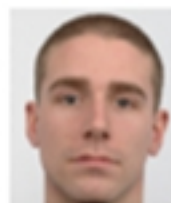

HAPPY

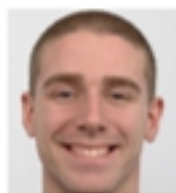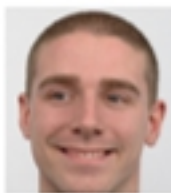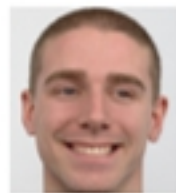

SAD

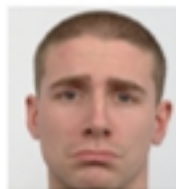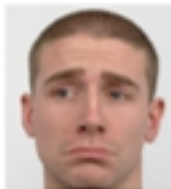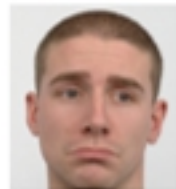

B

Rest

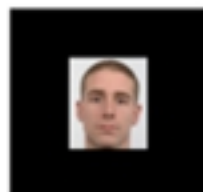

1000

Gap

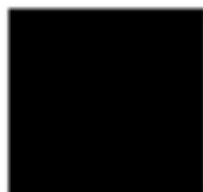

500

Emotional  
expression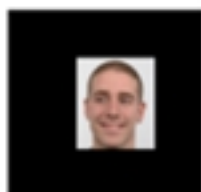

750

Fixation

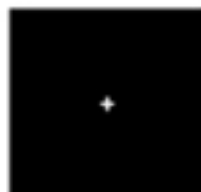

500-1000

Target

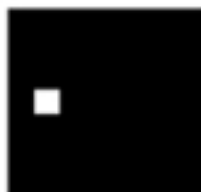

200

Response

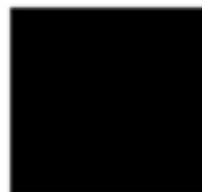

1500

Time (ms)

Figure 1



**A****NEUTRAL**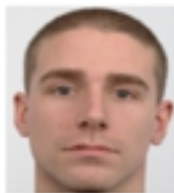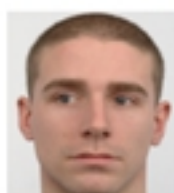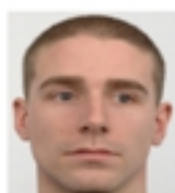**HAPPY**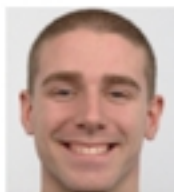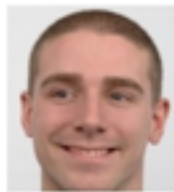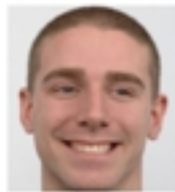**SAD**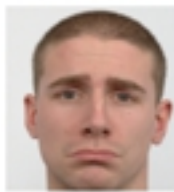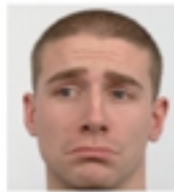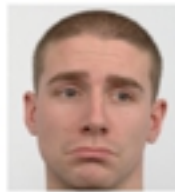**B**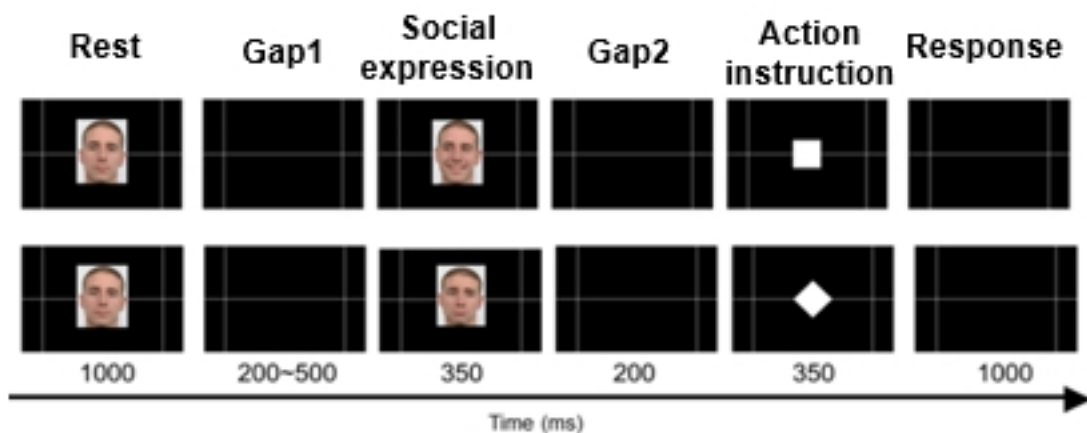**Figure 2**

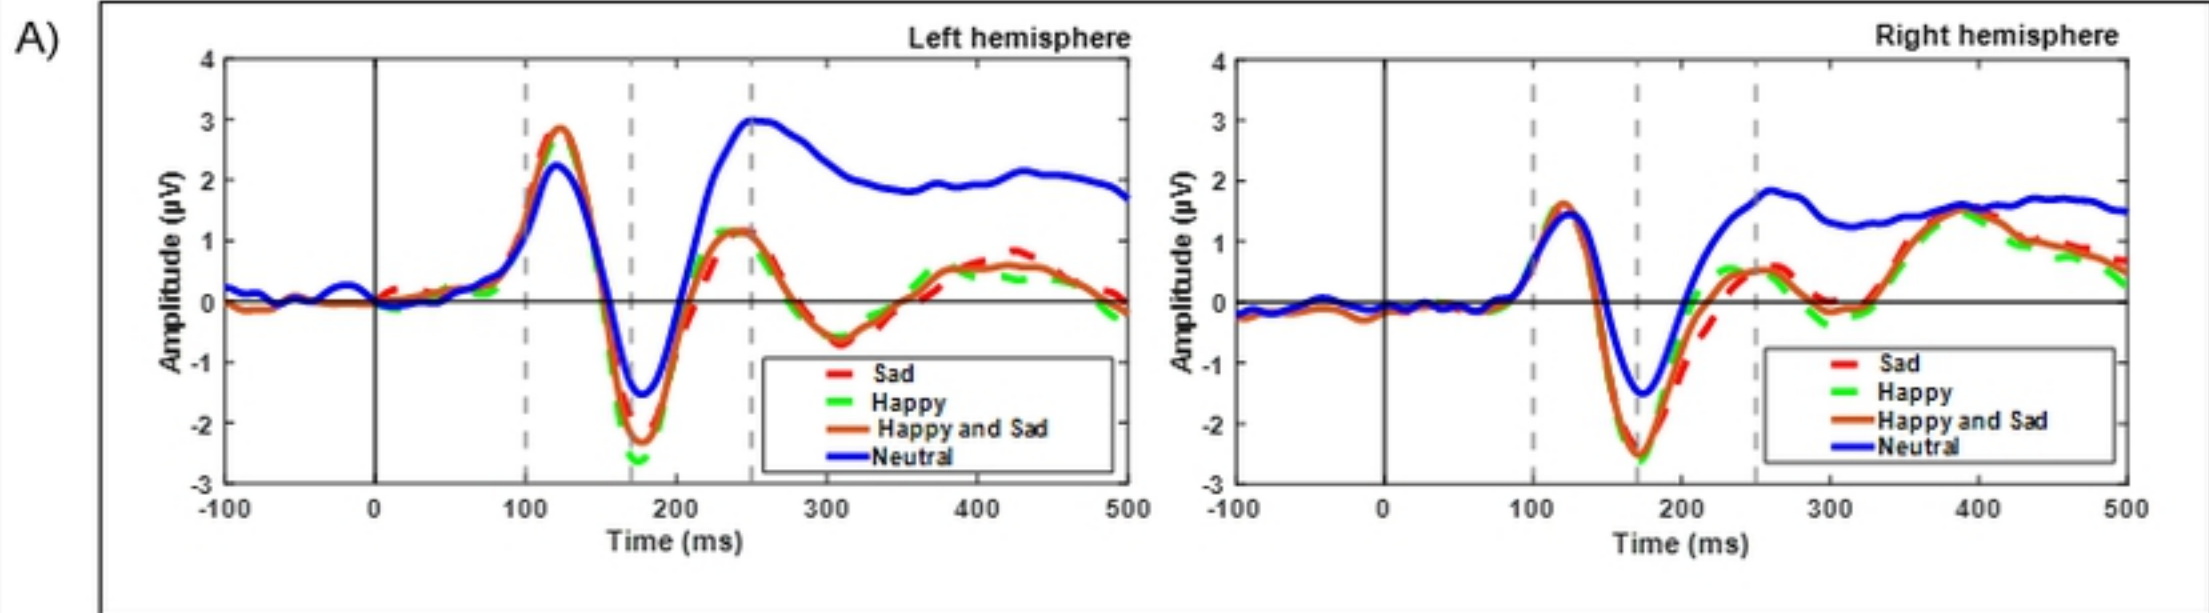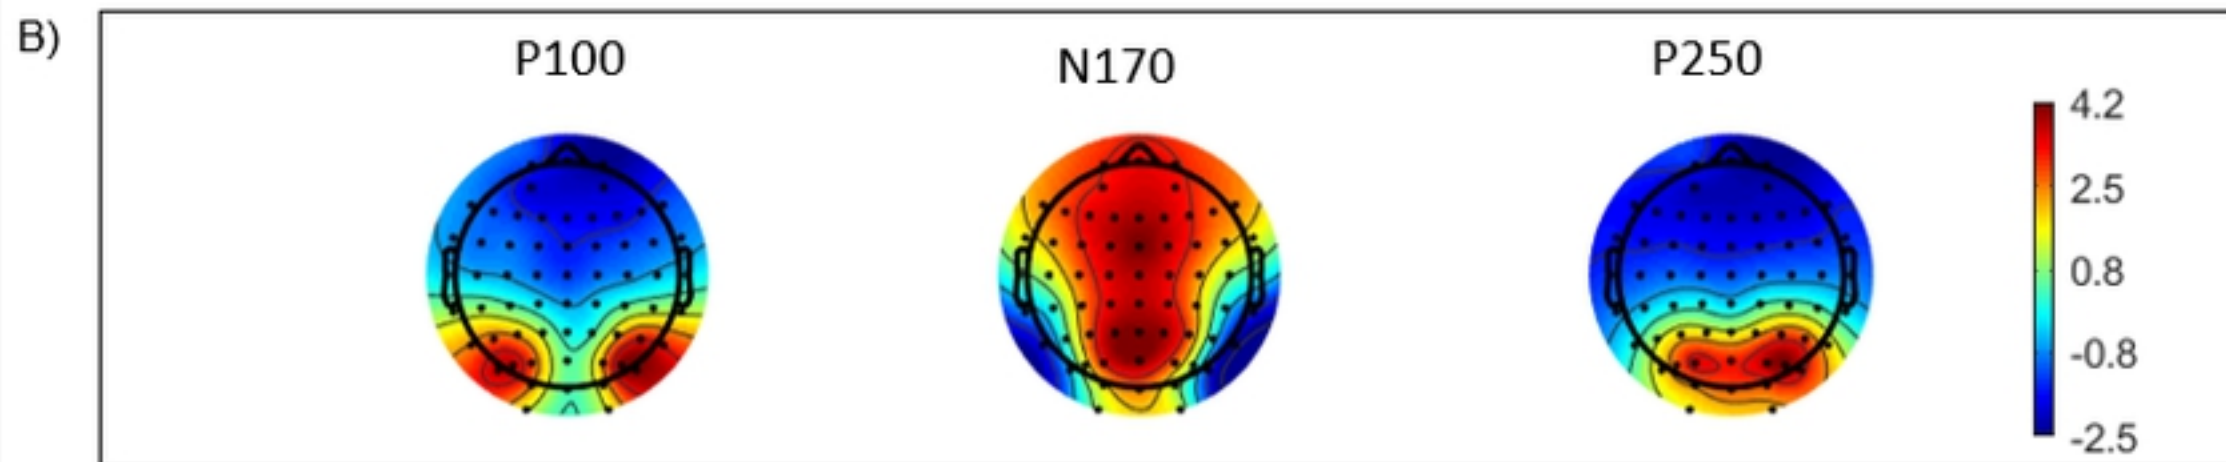

Figure 3

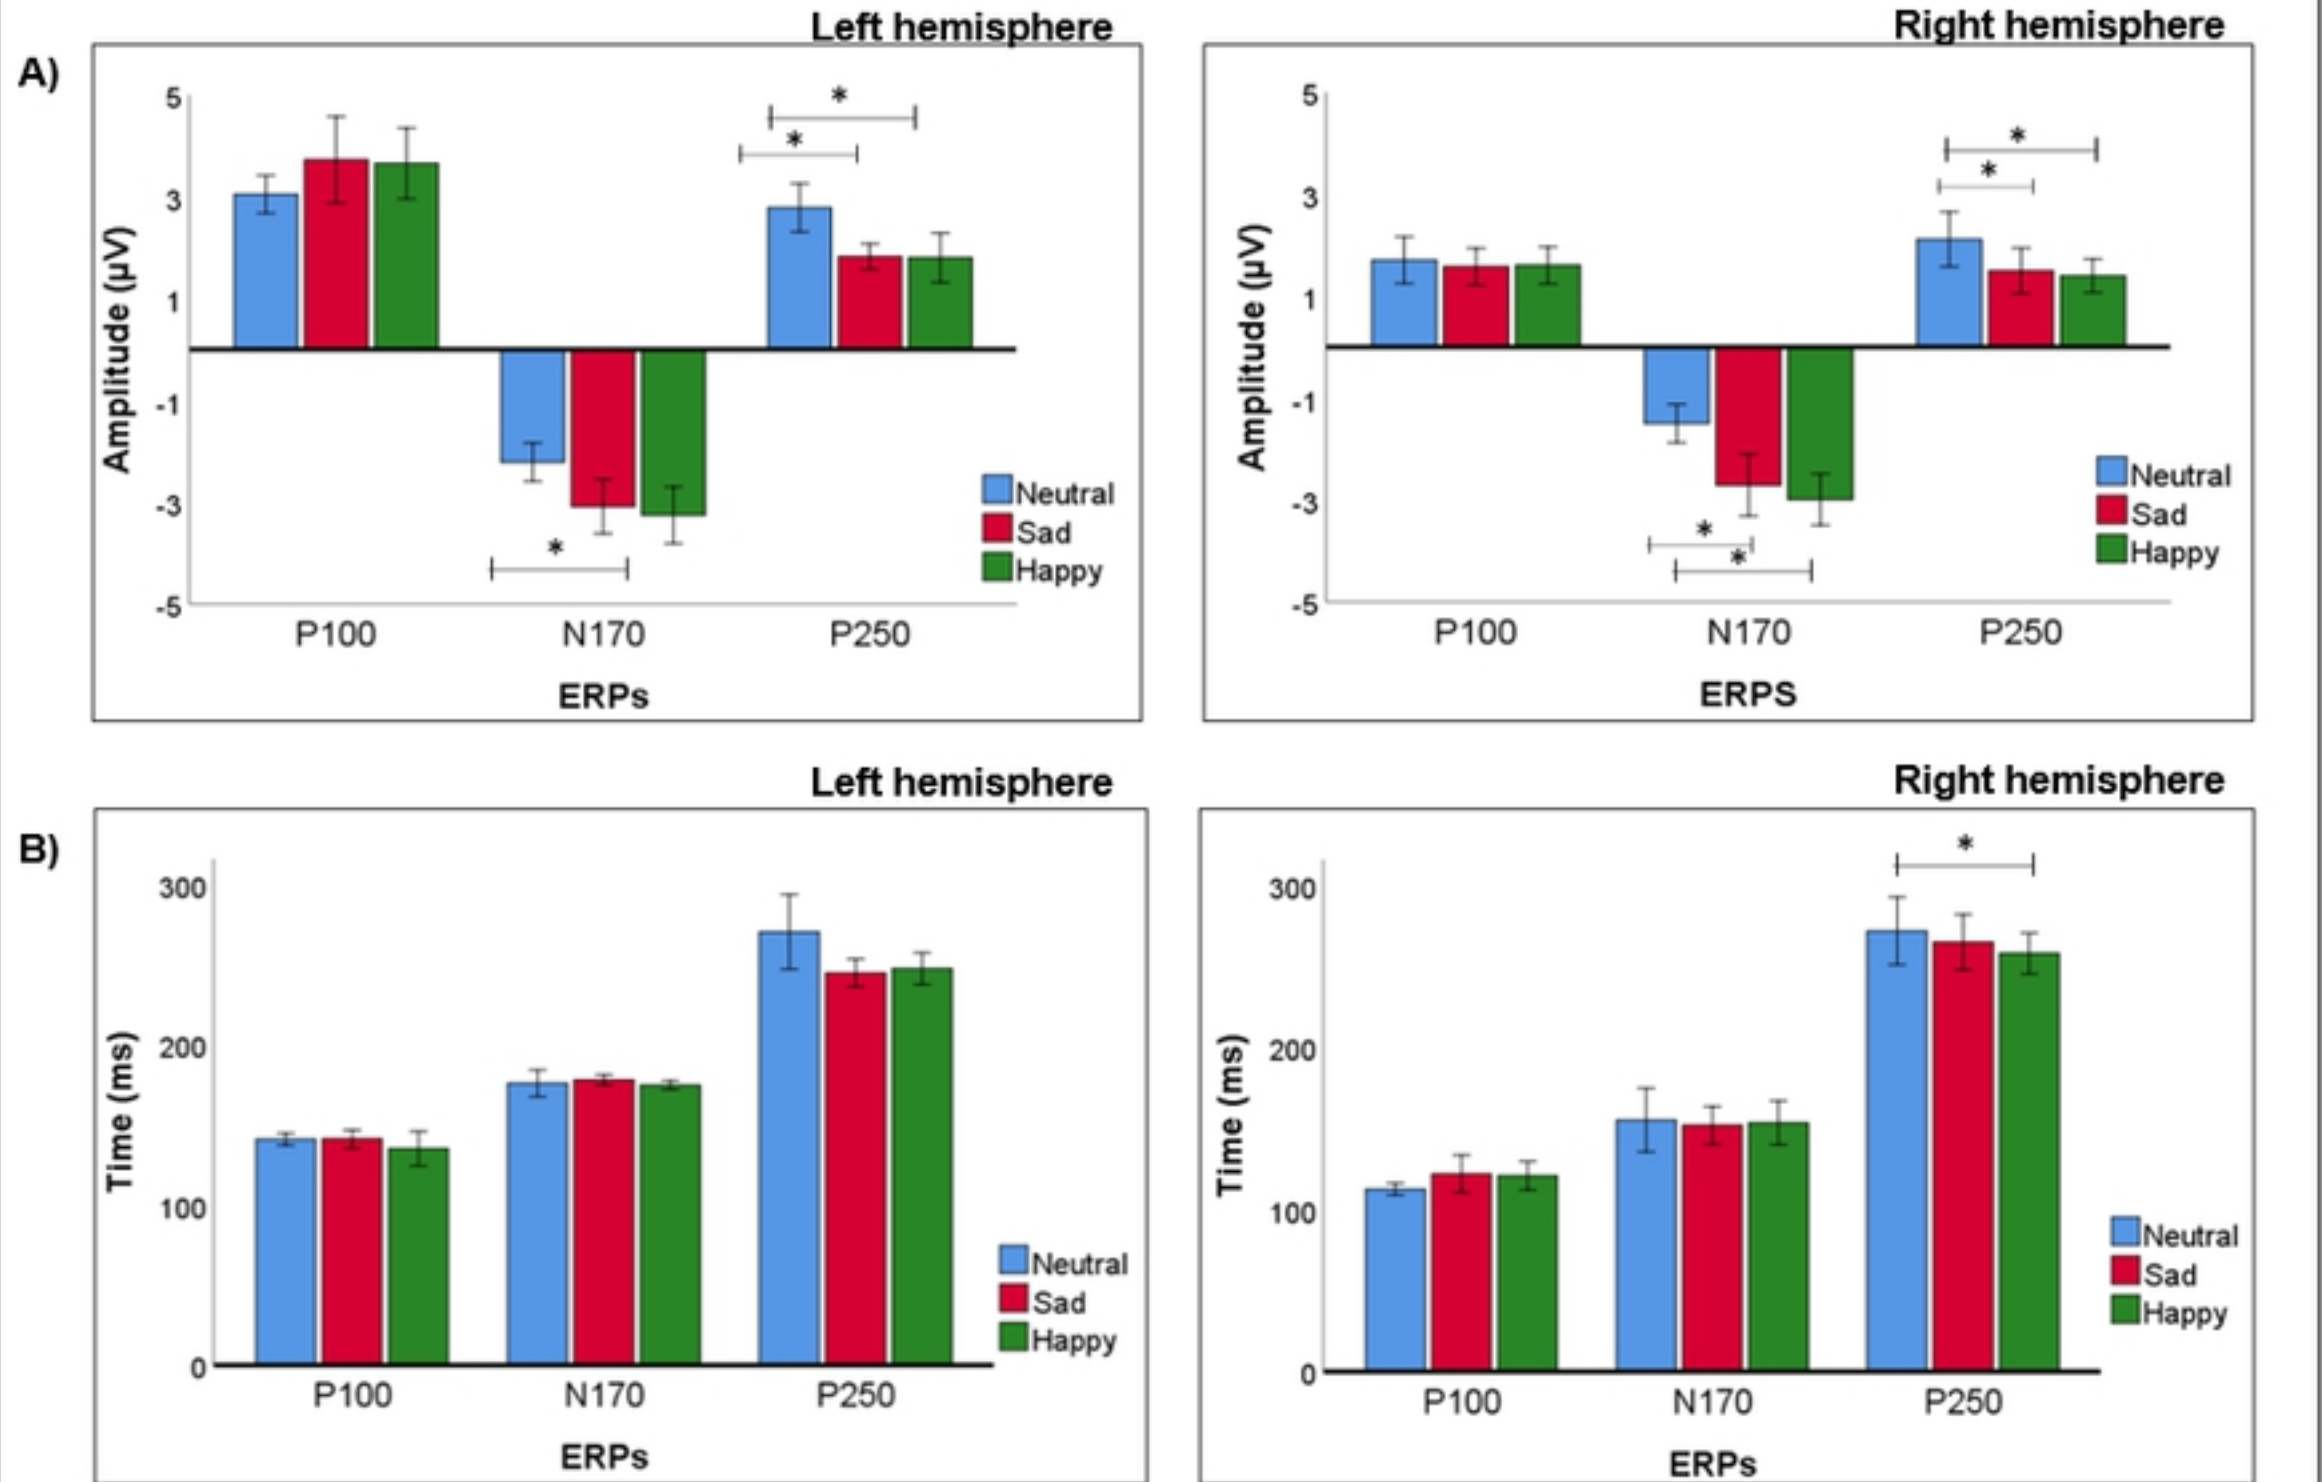

Figure 4

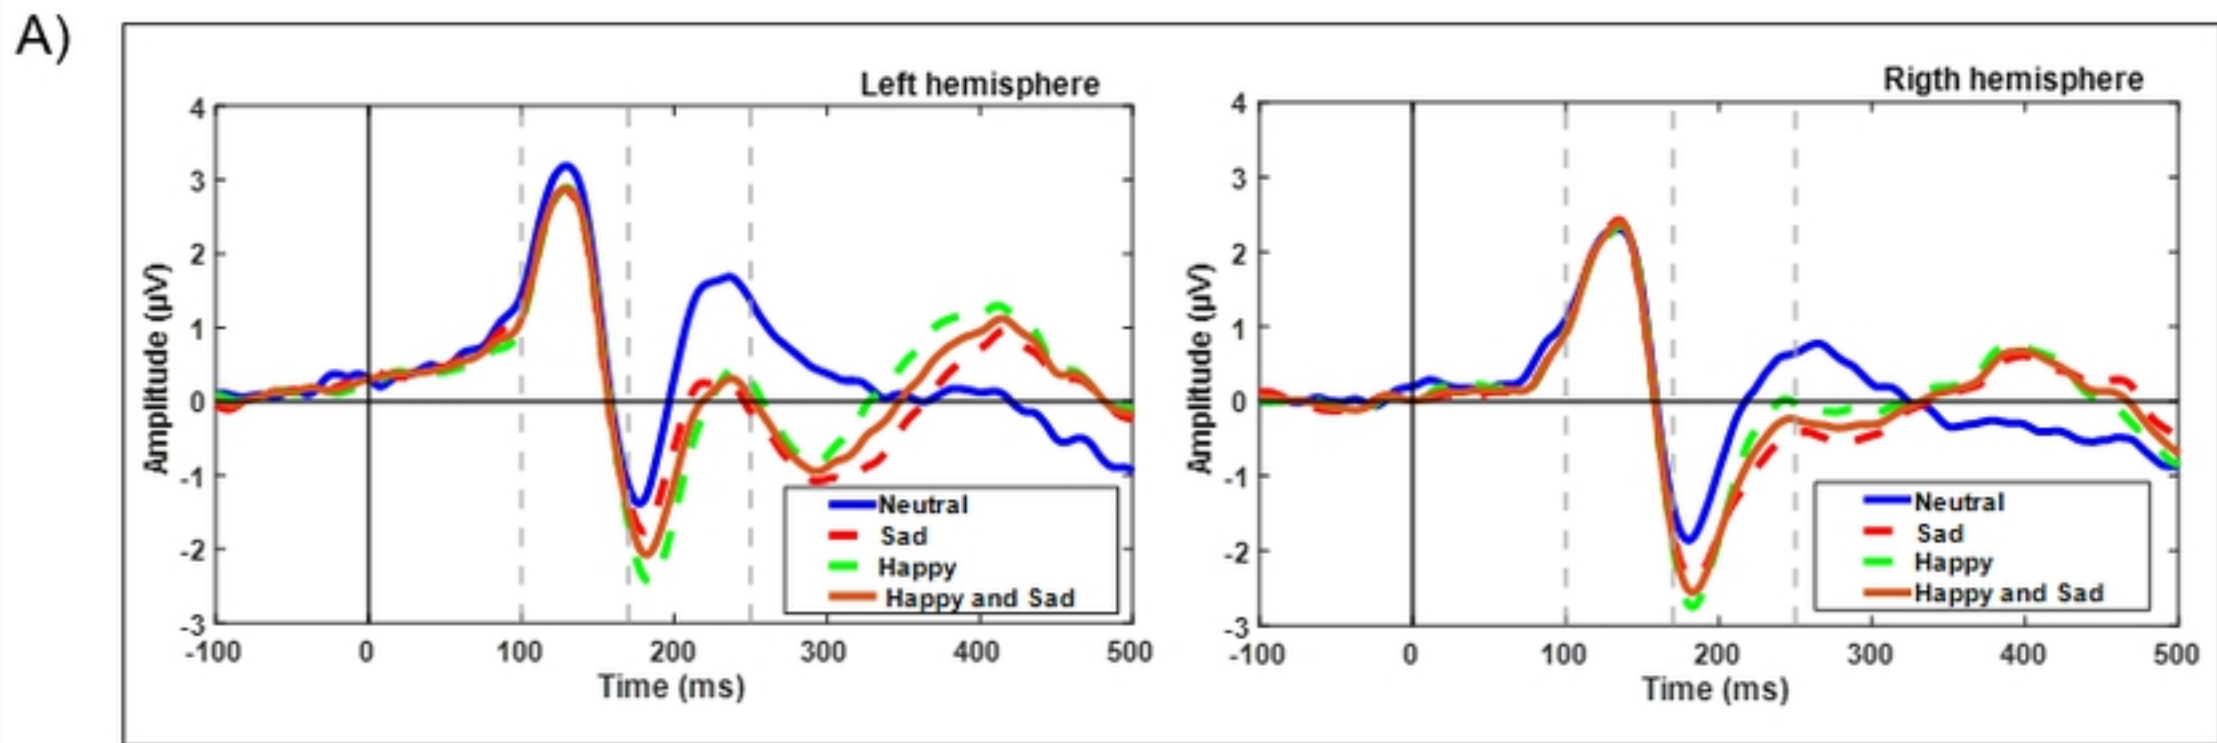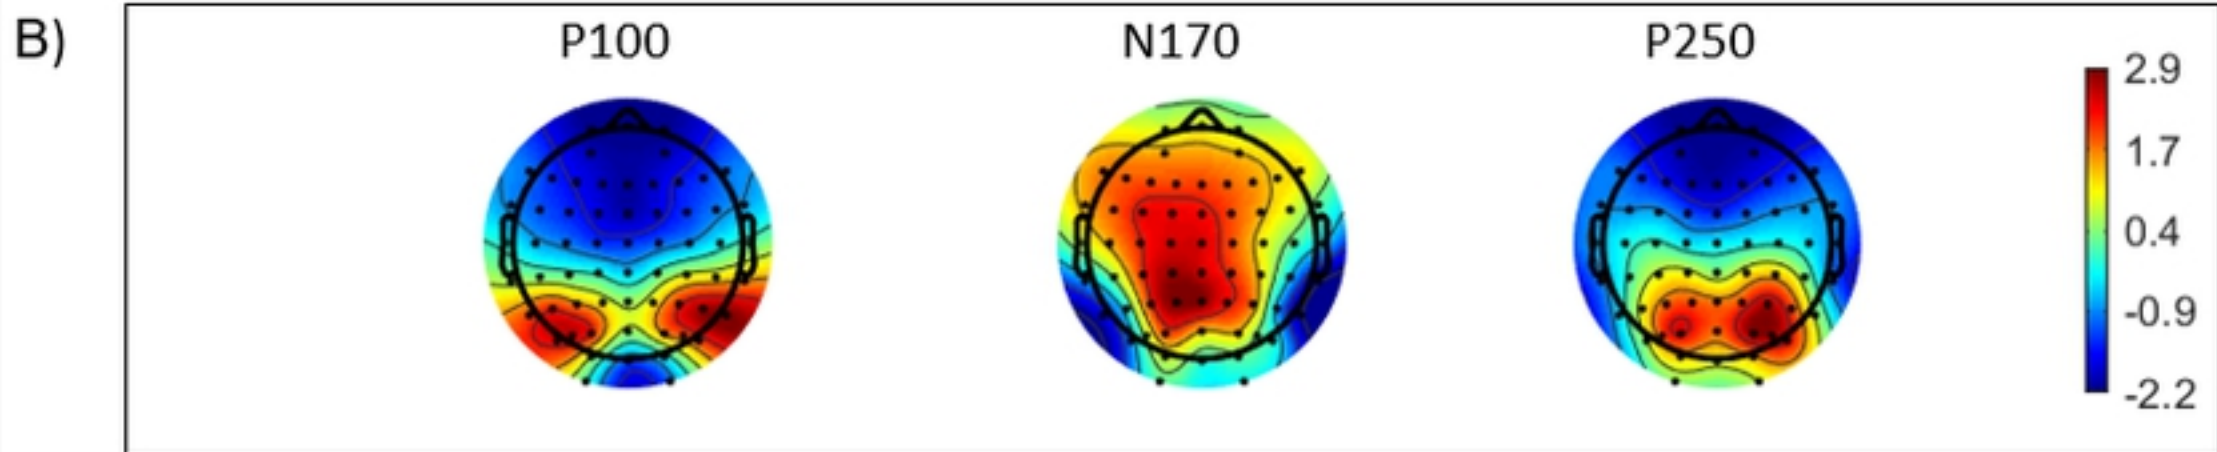

Figure 5

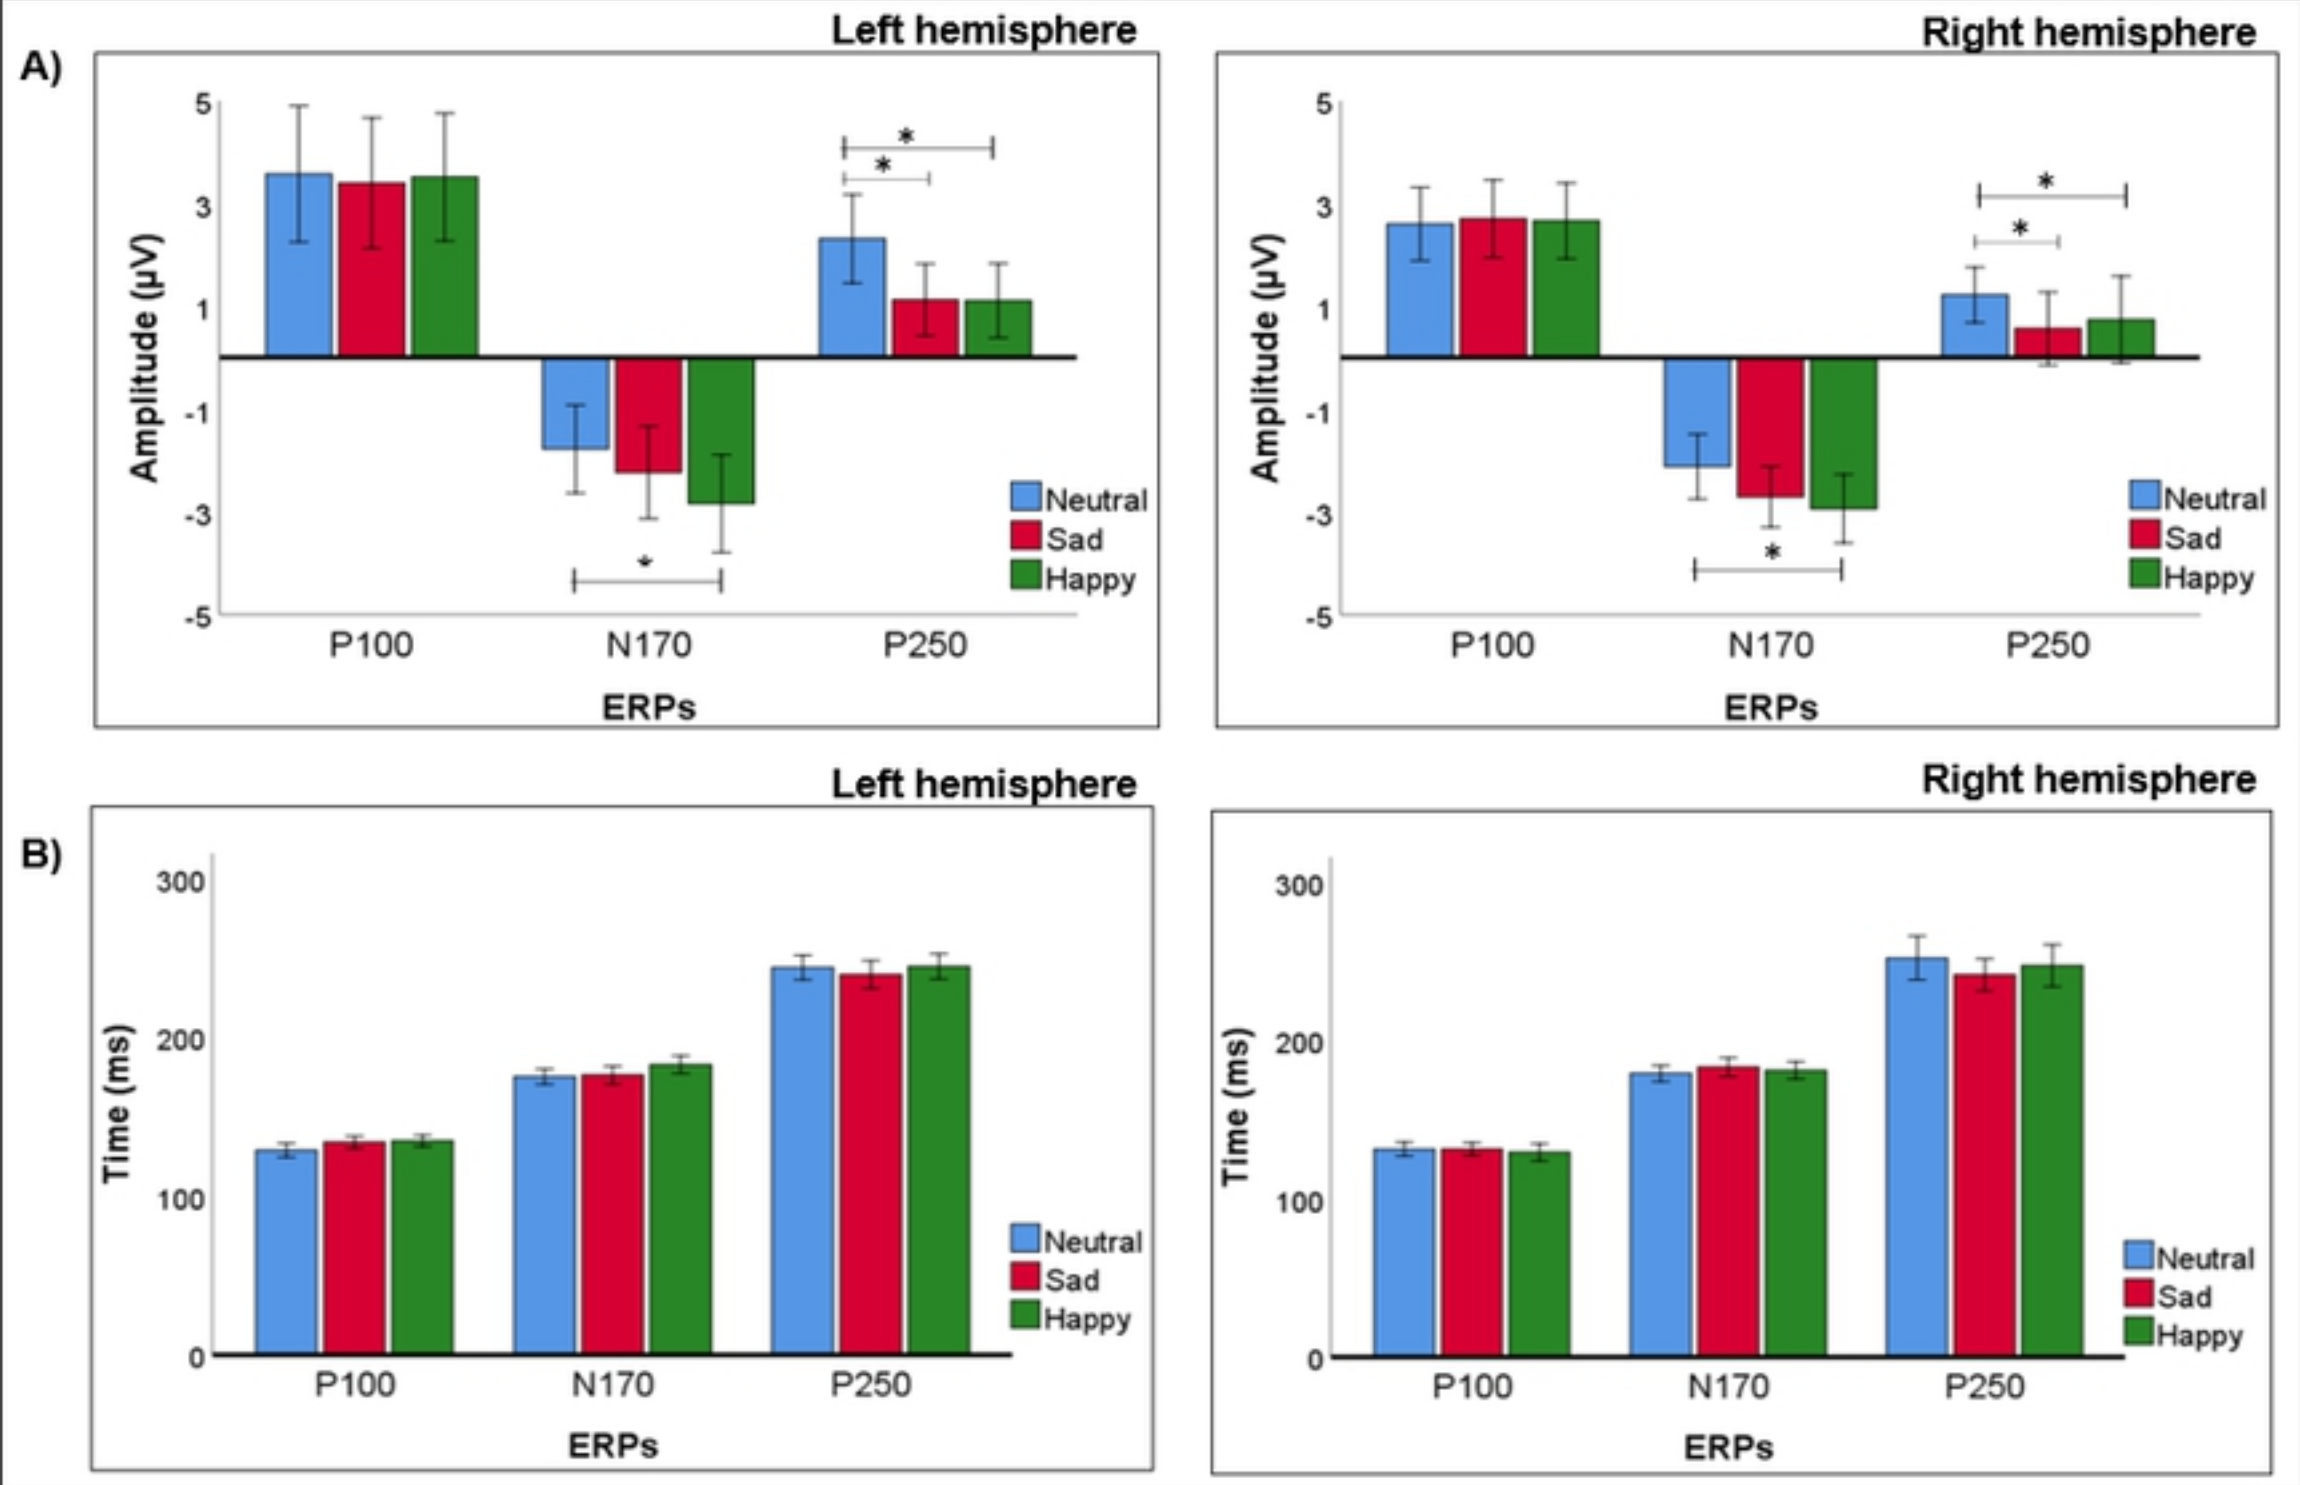

Figure 6

A)

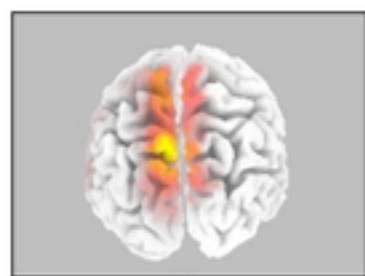

B)

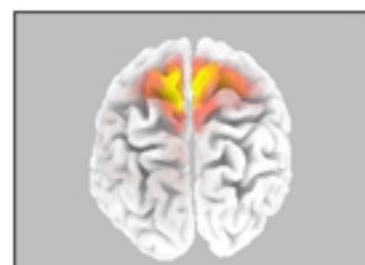

2.26

0

-2.26

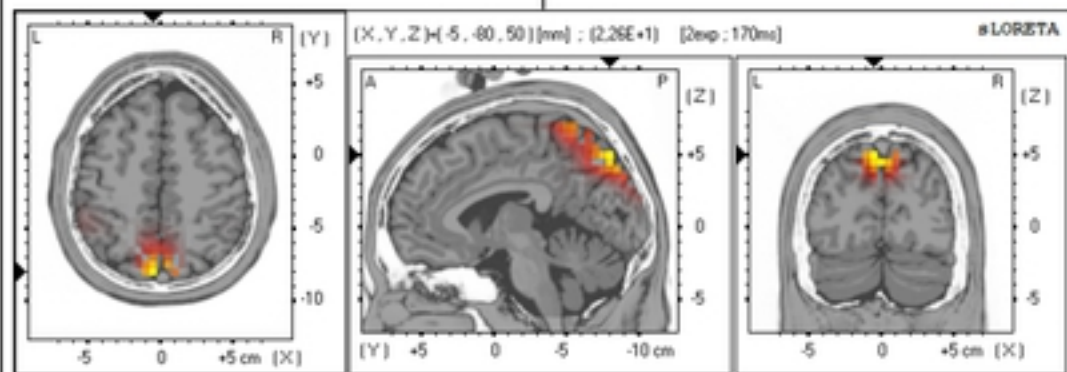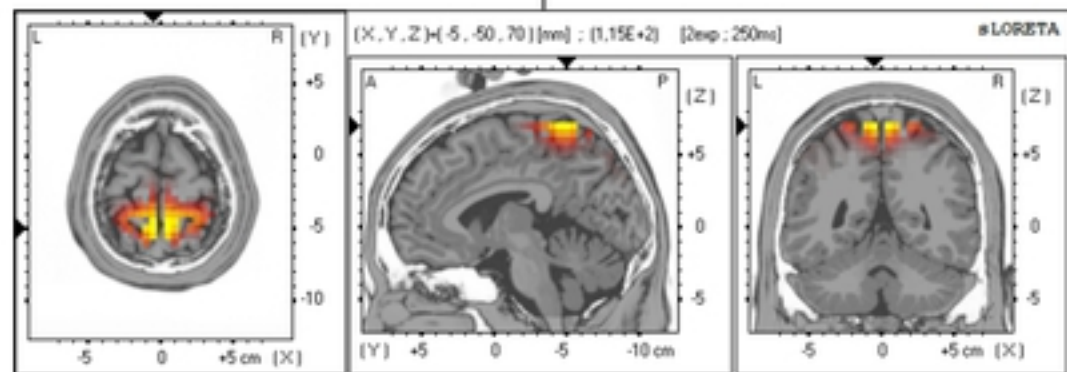

Figure 7
